# Supplementary material
Source: publisher site journal article supplement (https://www.spandidos-publications.com/481/downloadSupplementary)

Figure S1. PITC induces the degradation of  $\beta$ -tubulin in gastric cancer cells. (A) MGC-803 and HGC-27 cells were treated with DMSO, PITC (150  $\mu$ M for MGC-803 and 60  $\mu$ M for HGC-27 cells) or a combination of PITC and 5  $\mu$ M NAC, and the expression and morphology of  $\beta$ -tubulin (green) were observed under a fluorescence microscope. Scale bar, 100  $\mu$ m. (B and C) The expression levels of  $\beta$ -tubulin following PITC treatment were analyzed by western blotting, and GAPDH was used as a loading control. The results are expressed as fold-change relative to controls. \* $P$ <0.05 and \*\* $P$ <0.01. PITC, propyl isothiocyanate.

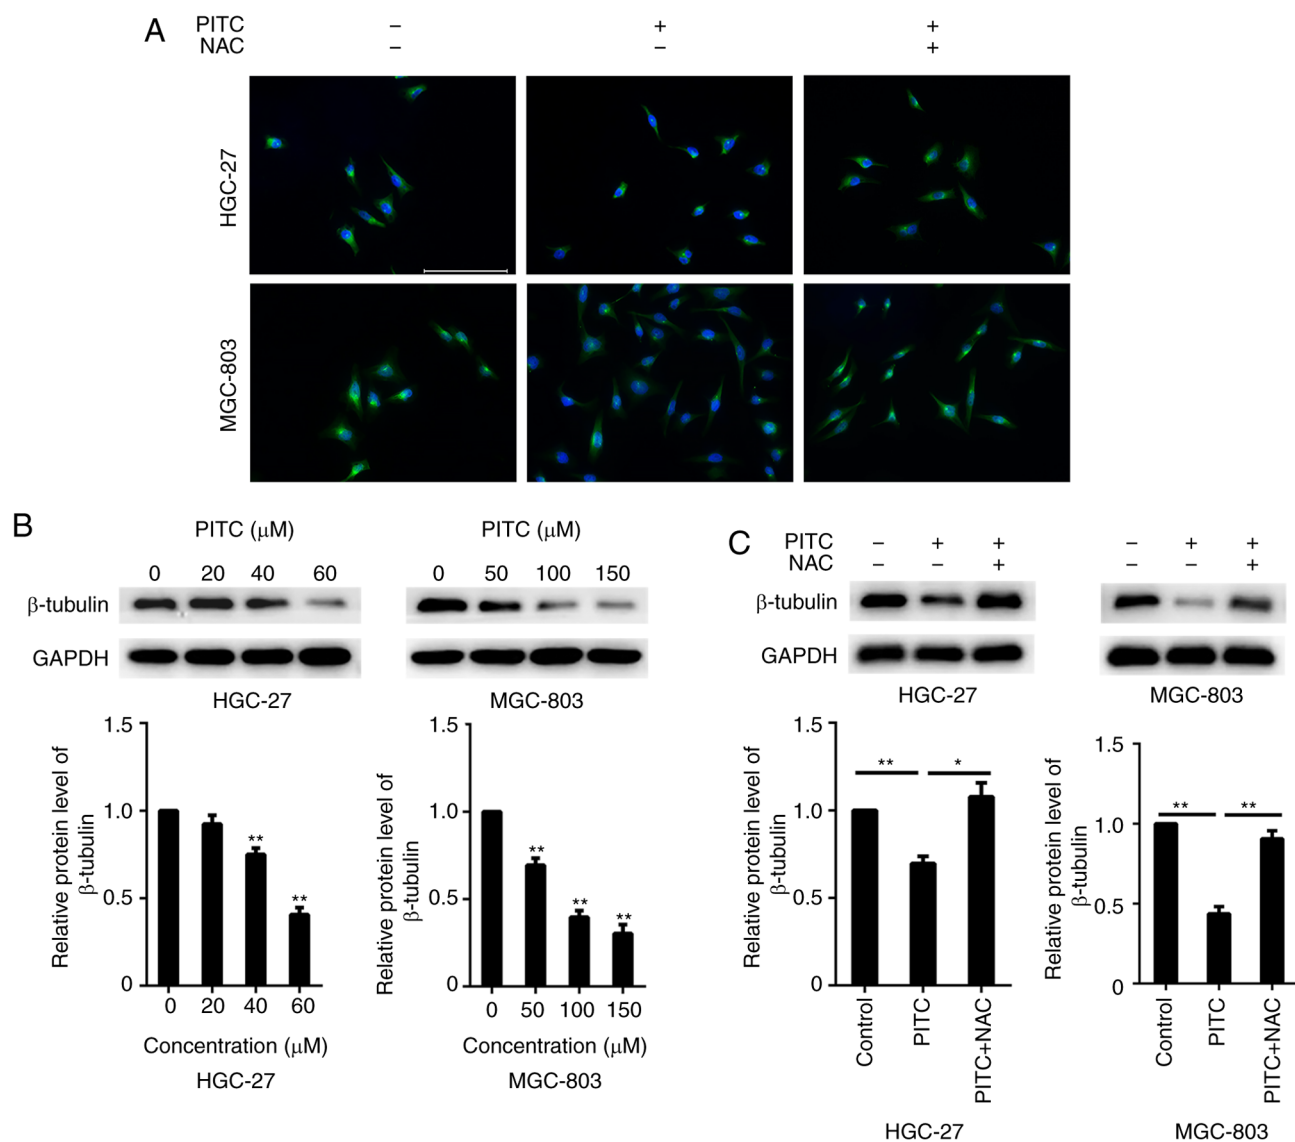

Supplement: Supplementary file 1 [file downloadSupplementary]
